# Supplementary material
Source: publisher figshare collection journal article supplement (https://karger.figshare.com/ndownloader/files/28880853)
Supplement: Supplementary file 1 [file 28880853]

| **Study** | **Treatment** | **From Treatment** | **From Diagnosis** | **As First-line Treatment** | **Downstage to Surgery** |
| --- | --- | --- | --- | --- | --- |
| Akinwande | SIRT | Survival curve unavailable | | | |
| Beuzit* | SIRT | Overlapping ticks cannot be mapped. Overlapping Sample Size with Manceau. | | | |
| Edeline 2015* | SIRT | Overlapping patient sample with Manceau. | | | |
| Edeline 2019* | SIRT | Overlapping ticks cannot be mapped. Overlapping Sample Size with Manceau. | | | Survival was calculated from the time of surgery |
| Manceau* | SIRT | Yes | Yes | Yes | NS |
| Rayar* | SIRT | Overlapping ticks cannot be mapped. Overlapping Sample Size with Manceau. | | | Survival was calculated from the time of surgery |
| Riby* | SIRT | Overlapping ticks cannot be mapped. Overlapping Sample Size with Manceau. | | | Survival was calculated from the time of surgery |
| Buettner | SIRT | Censored data was not labeled. | | | Survival curve unavailable |
| Camacho** | SIRT | Yes | Yes | None | NR |
| Rafi** | SIRT | Overlapping patient sample with Camacho | | | NR |
| Xing** | SIRT | Survival curve unavailable | | | NR |
| Filippi 2014*** | SIRT | Overlapping with Filippi 2020 | Yes | Yes | NR |
| Filippi 2019*** | SIRT | Overlapping with Filippi 2020 | | | NR |
| Filippi 2020*** | SIRT | Yes | NR | NR | NR |
| Mosconi 2016**** | SIRT | NR | NR | NR | NR |
| Mosconi 2020**** | SIRT | NR | NR | NR | NR |
| Gangi | SIRT | Yes | Yes | NR | NR |
| Haug***** | SIRT | NR | Overlapping patient sample with Hoffman | NR | NR |
| Hoffman  ***** | SIRT | Yes | NR | NR | NR |
| Ibrahim  ****** | SIRT | Overlapping with Mouli | NR | NR | Overlapping with Mouli |
| Mouli  ****** | SIRT | Yes | NR | NR | Yes |
| Jia | SIRT | Yes | Yes | NR | NR |
| Koehler | SIRT | Yes | NR | NR | NR |
| Levillain | SIRT | Yes | NR | NR | NR |
| Reimer | SIRT | Yes | Yes | Yes | NR |
| Saxena | SIRT | Censored data was not labeled. | | | Survival time unknown |
| Shanker | SIRT | Censored data was not labeled. | | | Survival time unknown |
| Soydal | SIRT | Yes | NR | NR | NR |
| White | SIRT | Yes | NR | NR | NR |
| Ben-Josef | Conventional Dose RT (photon) | Mixed with HCC | | | |
| Chen* | Conventional Dose RT (photon) | Yes | Yes | Yes | NR |
| Zeng* | Conventional Dose RT (photon) | Overlapping patient sample with Chen | | | NR |
| Cho | Conventional Dose RT (photon) | Yes | Yes | Yes | Yes |
| Hijazi | SBRT (photon) | Yes | NR | NR | NR |
| Hong** | Proton Therapy | Yes | NR | NR | NR |
| Smart** | Hypofractionated RT (both photon and proton) | NR | Yes | NR | NR |
| Yoon** | Mixed RT (both photon and proton) | Overlapping patient sample with Hong and Smart | | | NR |
| Tao** | Ablative Dose RT (both photon and proton) | NR | Yes | NR | NR |
| Ibarra | SBRT | Yes | NR | NR | NR |
| Kasuya | Carbon-ion RT | Yes | NR | NR | NR |
| Kozak | SBRT | Censored data was not labeled. | | | NR |
| Kim | Conventional Dose RT(both photon and proton) | Yes | Yes | Yes | NR |
| Liu | SBRT (photon) | Mixed with extrahepatic iCCA  NR  NR | | | |
| Ohkawa  *** | Proton Therapy | Overlapping patient sample with Shimizu | | | NR |
| Shimizu  *** | Proton Therapy | Yes | Yes | Yes | NR |
| Shen | SBRT (photon) | Yes | NR | NR | NR |
| Sumiyoshi | Conventional Dose RT (photon) | Yes | Yes | Yes | Yes |
| Tse | Conventional Dose RT (photon) | Censored data was not labeled | | | NR |
| Weiner | SBRT (photon) | NR | | | |

**Supplement Table 1**: Reasons of inclusion vs exclusion of per-patient survival analysis. NR: not reported. RT: radiation therapy. SBRT: stereotactic-body radiation therapy. SIRT: selective-internal radiation therapy.
